# Supplementary material
Source: Springer Nature journal article supplement (https://www.springermedizin.de/resource/supplementary/12936_2008_790_MOESM5_ESM.pdf/9548936)

### *P. falciparum*

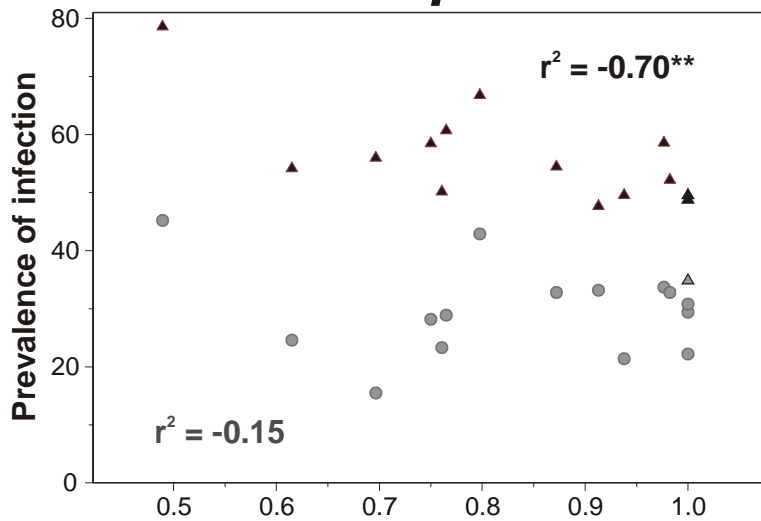

### *P. vivax*

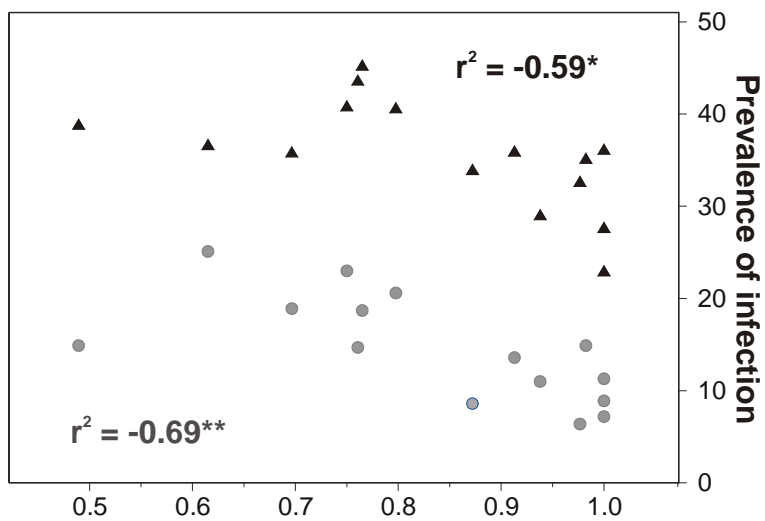

### *P. malariae*

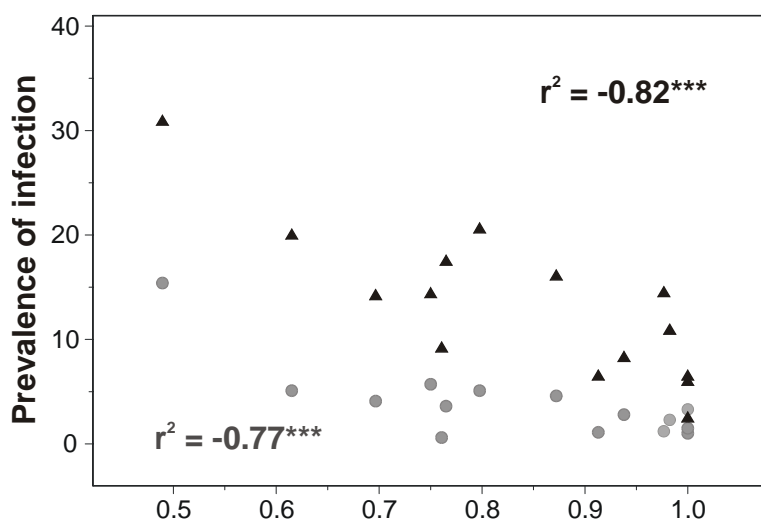

### *P. ovale*

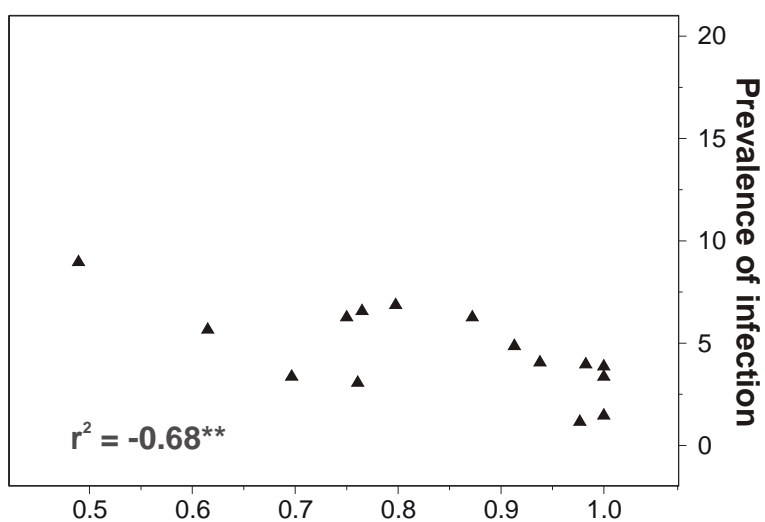

### Any infection

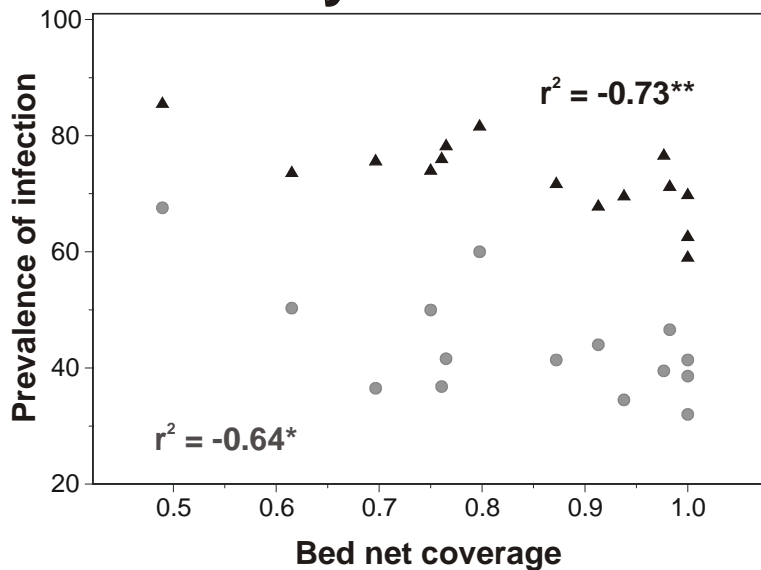

- ▲ LDR-FMA diagnosed
- LM diagnosed

Supplement: MOESM5 [file 9548936]
